# Supplementary material for: Nuclear pore complexes mediate subtelomeric gene silencing by regulating PCNA levels on chromatin
Source: PubMed Central journal article supplement — J Cell Biol. 2023 Jun 26;222(9):e202207060. doi: 10.1083/jcb.202207060 (PMC10292210; doi:10.1083/jcb.202207060), 2023-06-26

# Related to Fig. S3

## Related to Fig. S3A

WB: FLAG

Fig. S3A- Nup170-FLAG: Eluate

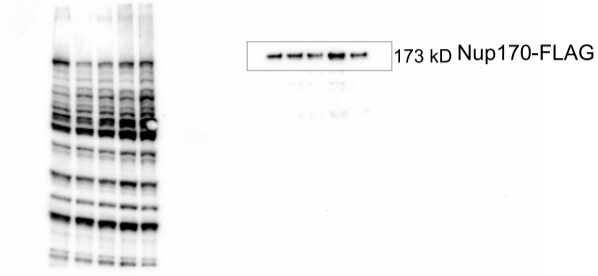

WB: FLAG

Fig. S3A- Nup170-FLAG: Load

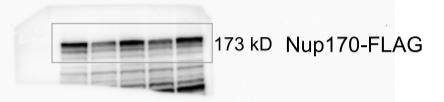

WB: Clb2

Fig. S3A- Clb2: Load

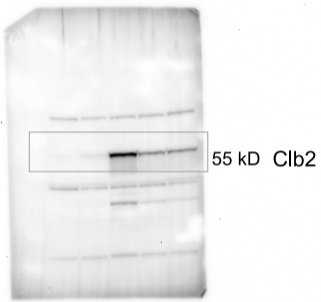

WB: G6PDH

Fig. S3A- G6PDH: Load

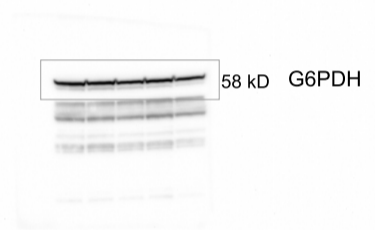

## Related to Fig. S3B

WB: FLAG

Fig. S3B- Nup170-FLAG: Eluate

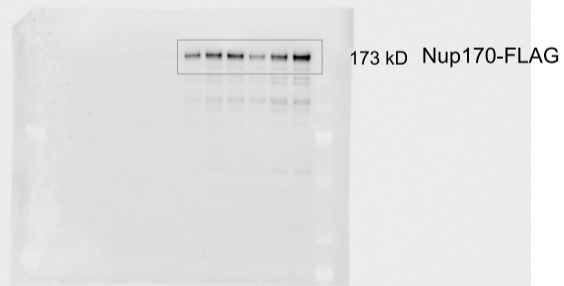

WB: FLAG

Fig. S3B- Nup170-FLAG: Load

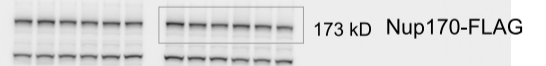

WB: Clb2

Fig. S3B- Clb2: Load

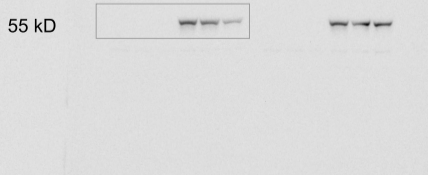

WB: G6PDH

Fig. S3B- G6PDH: Load

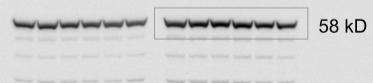

Supplement: JCB_202207060_SourceDataFS3.pdf [file JCB_202207060_SourceDataFS3.pdf]
