# Supplementary figures and images for: Nuclear pore complexes mediate subtelomeric gene silencing by regulating PCNA levels on chromatin
Source: PubMed Central journal article supplement — J Cell Biol. 2023 Jun 26;222(9):e202207060. doi: 10.1083/jcb.202207060 (PMC10292210; doi:10.1083/jcb.202207060), 2023-06-26

# Related to figure 3D

## Loads

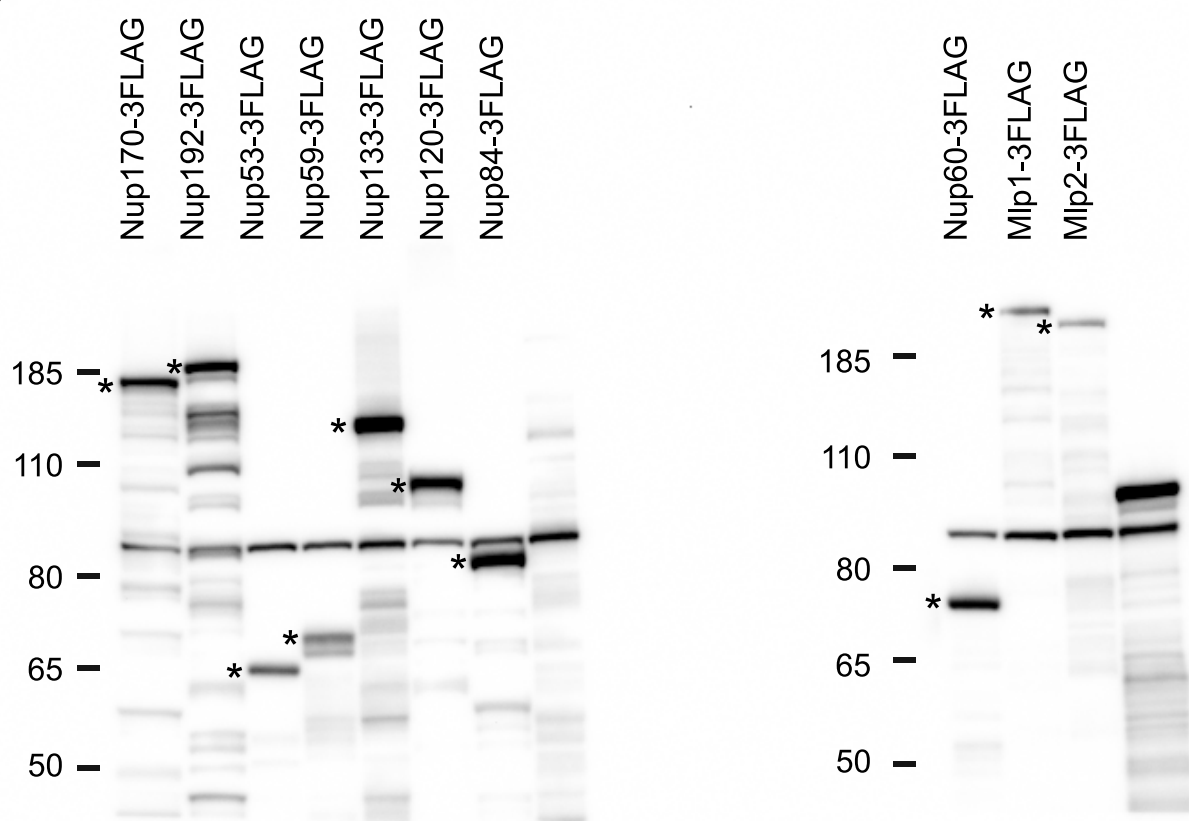

## Nup1-6HA

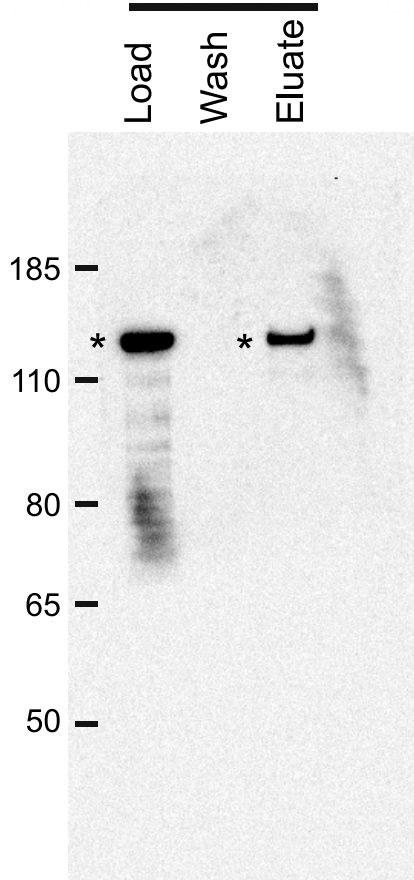

## Washes and eluates

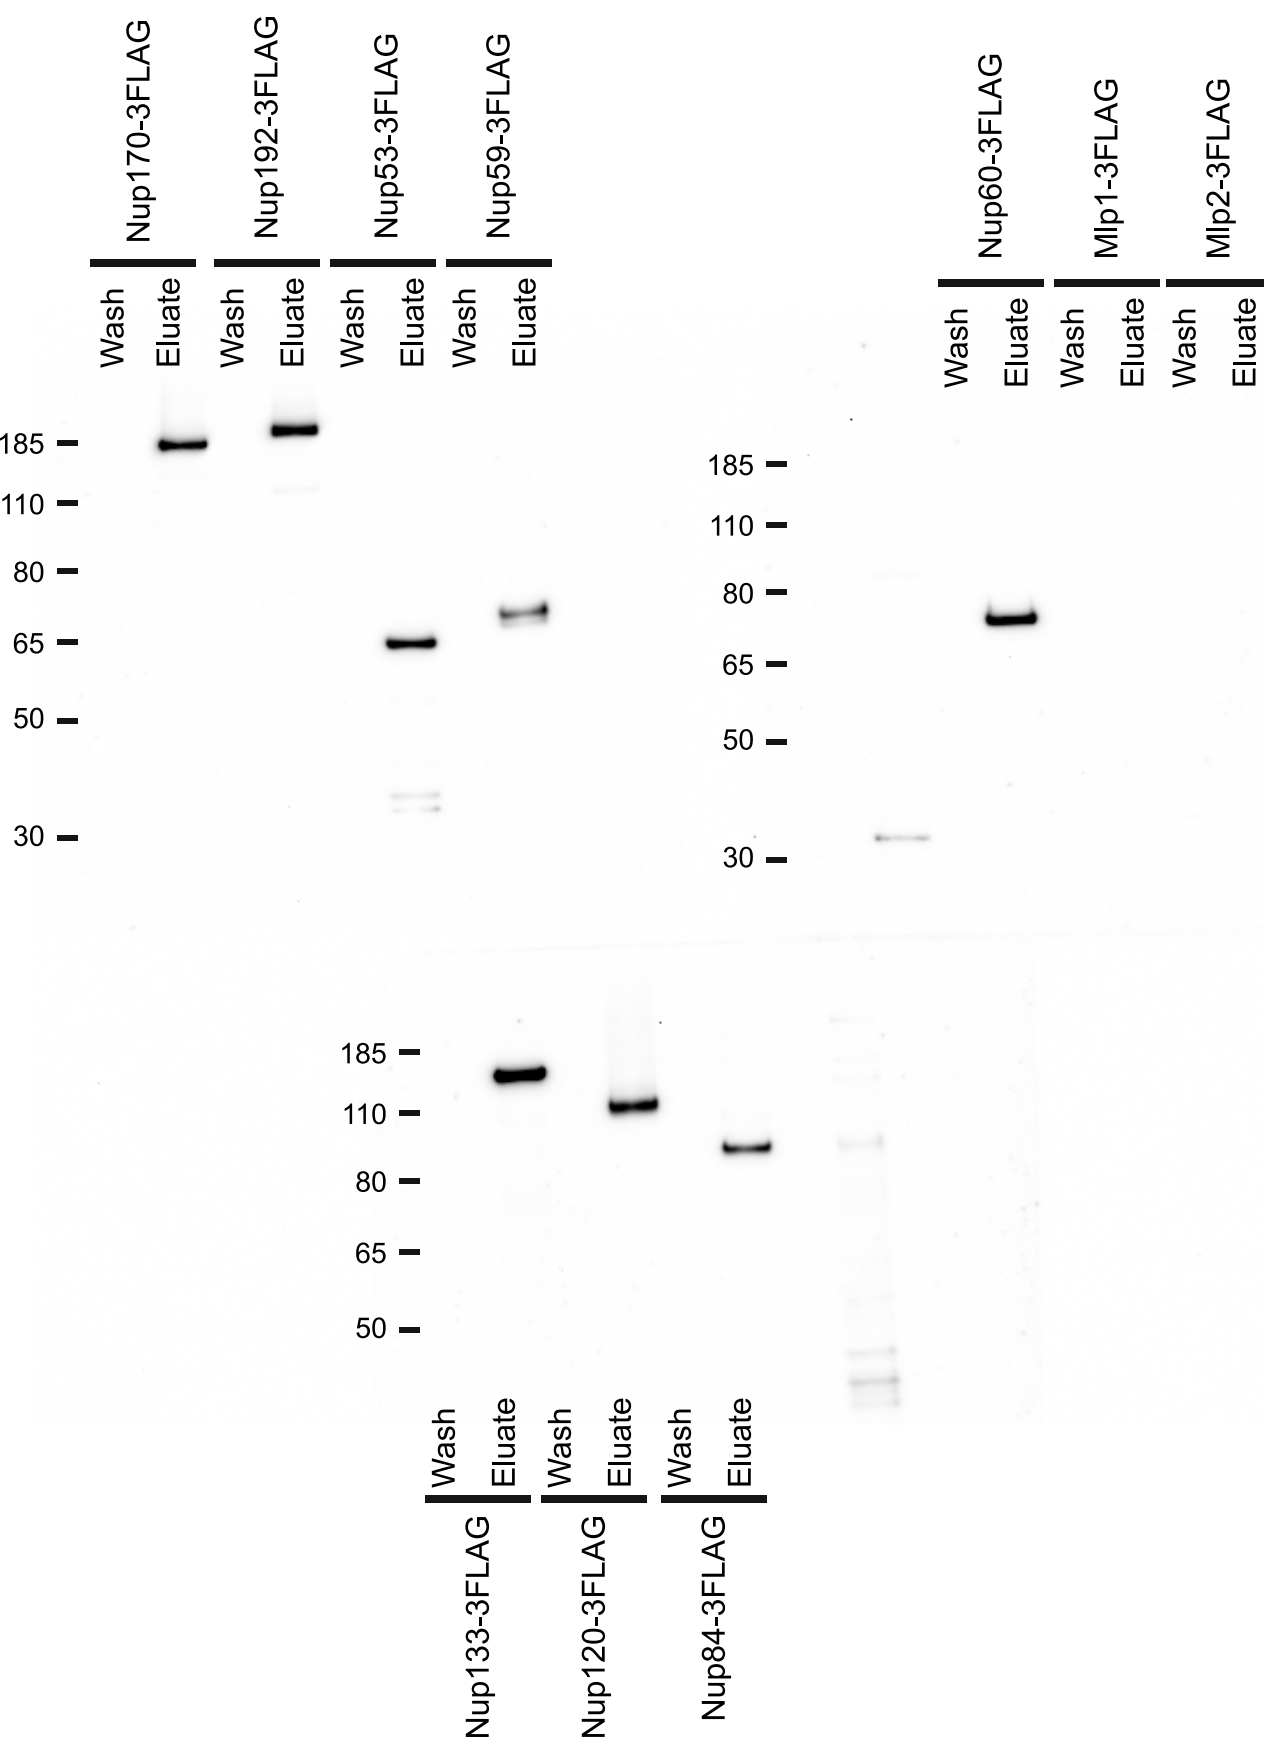

Supplement: JCB_202207060_SourceDataF3.pdf [file JCB_202207060_SourceDataF3.pdf]

# Related to Fig. 4D

WB: FLAG

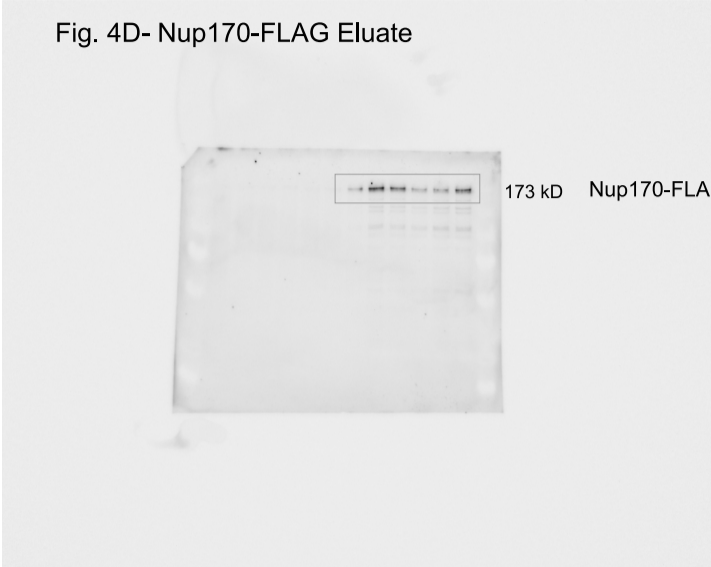

WB: FLAG

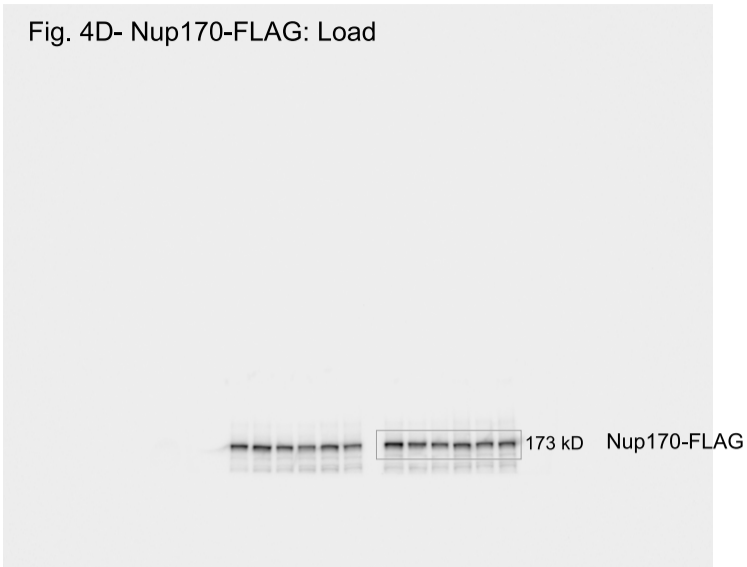

WB: Clb2

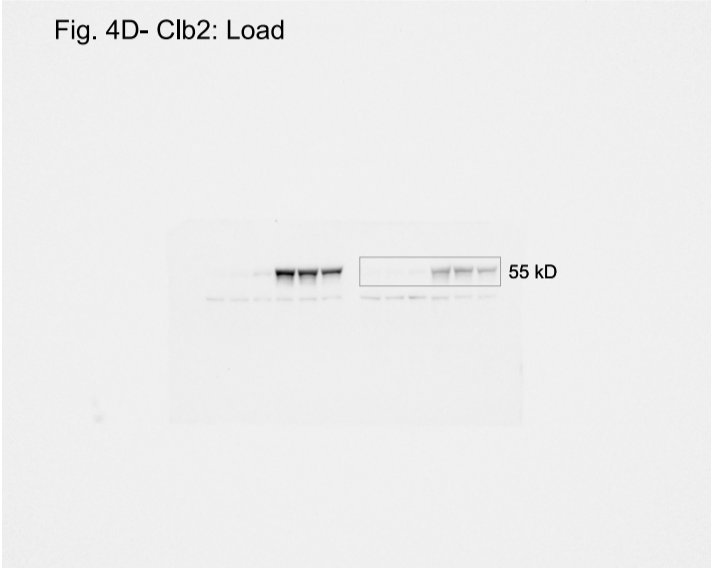

WB: G6PDH

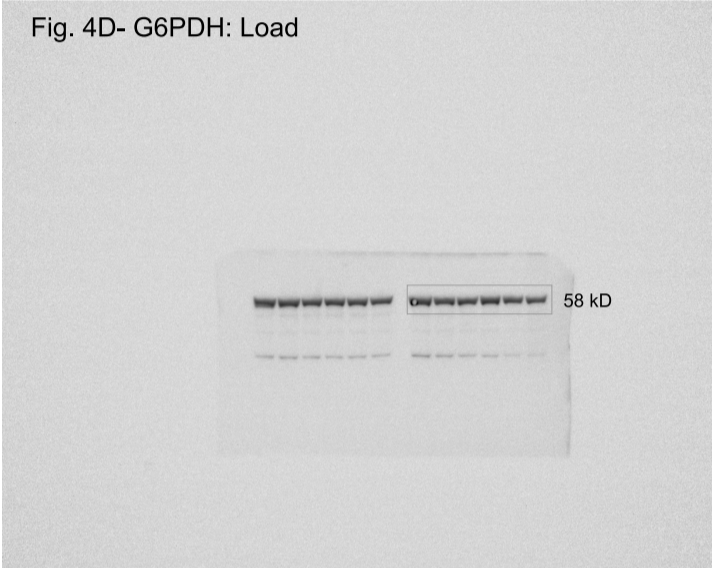

Supplement: JCB_202207060_SourceDataF4.pdf [file JCB_202207060_SourceDataF4.pdf]

# Related to Fig. S1C

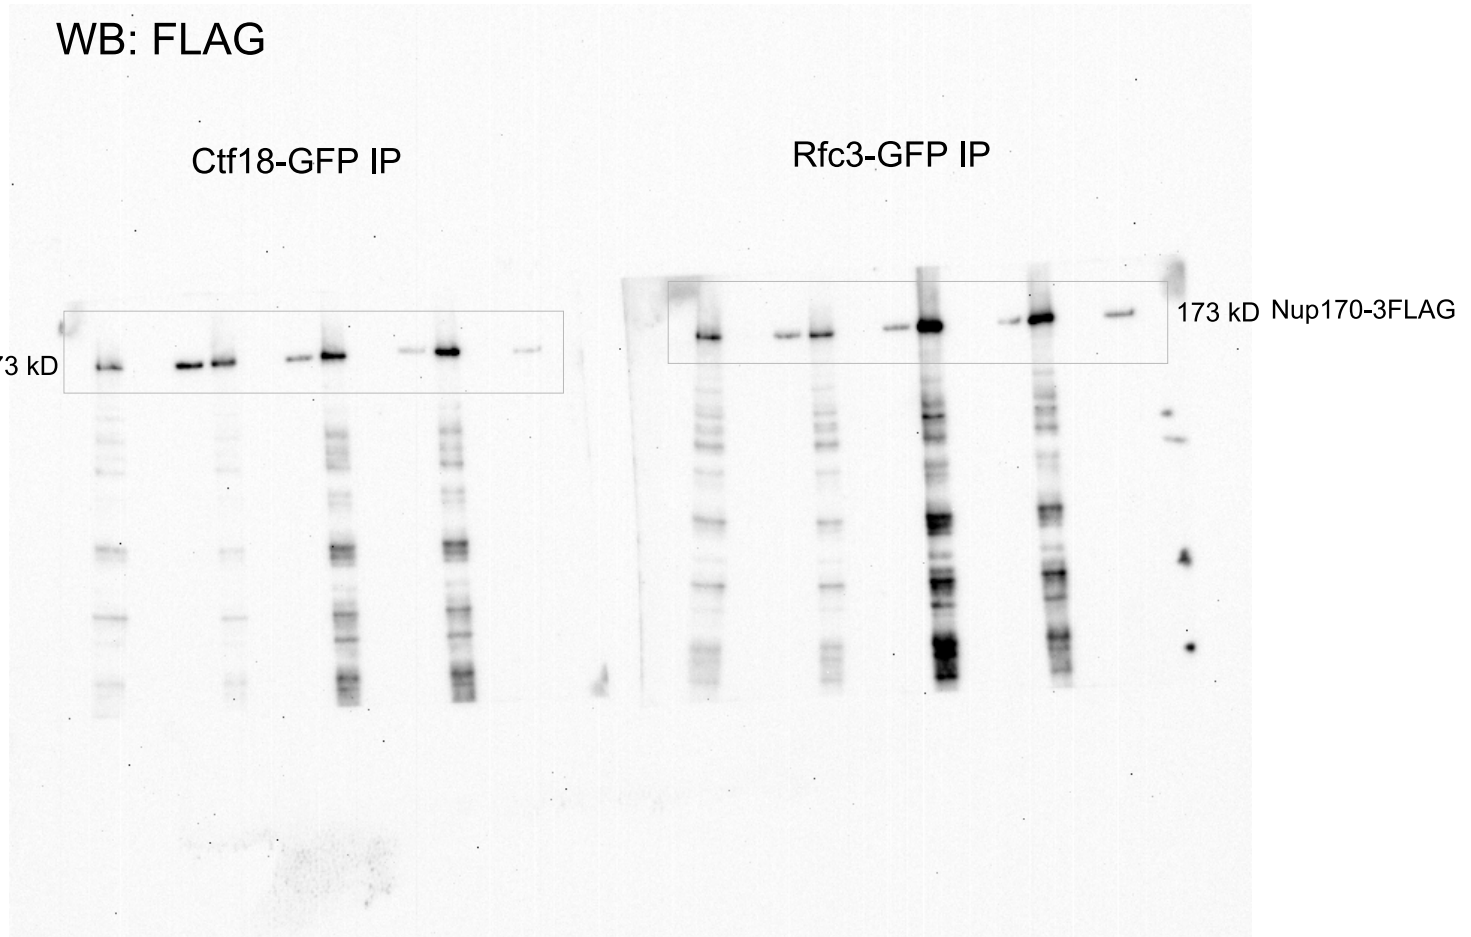

Supplement: JCB_202207060_SourceDataFS1.pdf [file JCB_202207060_SourceDataFS1.pdf]
